# Supplementary material for: Network pharmacology of bioactives from Sorghum bicolor with targets related to diabetes mellitus
Source: PubMed Central journal article supplement (PMC7774932; doi:10.1371/journal.pone.0240873), 2020-12-31
Supplement: pone.0240873.s001.pdf [file pone.0240873.s001.pdf]

**A list of 308 genes in SEA****A list of 324 genes in STP**

---

|         |         |
|---------|---------|
| AKR1B1  | GBA     |
| NCOA3   | AKR1B1  |
| P2RY6   | ADA     |
| P2RY2   | CDA     |
| SLC29A1 | ADK     |
| P2RY14  | DPP4    |
| P2RY4   | ADORA1  |
| SLC28A2 | ADORA2A |
| CDA     | ADORA3  |
| ADK     | HSPA8   |
| ADORA3  | GAPDH   |
| HSPA5   | AHCY    |
| AMD1    | HSPA5   |
| HSPA8   | TK1     |
| ST6GAL1 | MAPK1   |
| ADORA1  | MCL1    |
| TOP1    | PYGM    |
| DNPH1   | PDCD4   |
| ADORA2A | CA2     |
| P2RX1   | CA1     |
| RNASE1  | TYMS    |
| RNASE2  | OGA     |
| KMT5C   | CA12    |
| SETDB1  | CA9     |
| RNASEL  | GAA     |
| DNMT3B  | GSK3B   |
| GAPDH   | FUCA1   |
| SRM     | PNP     |

P2RY11  
POLB  
ADA  
AHCY  
GPR17  
SMS  
PARG  
TK1  
GBA  
HEXA  
HEXB  
CD69  
POLG  
QARS  
P2RX4  
ATIC  
DOT1L  
PLCG1  
ADORA2B  
RAC1  
PDCD4  
SLC5A2  
KMT2A  
EHMT1  
CA9  
TPMT  
CA12  
EZH1  
SUV39H1

PIM1  
EHMT1  
EHMT2  
CA14  
GRK1  
CCND1  
CDK4  
DAO  
F2  
IDO1  
CTRB1  
NISCH  
SLC6A3  
PIK3CA  
PIK3R1  
CTSK  
CTSL  
CTSB  
CYP1B1  
SIGMAR1  
CHRM2  
CHRM1  
CYP19A1  
MAOB  
BRD2  
TBXAS1  
UTS2R  
GABRB3  
GABRG2

|        |         |
|--------|---------|
| CA14   | GABRA5  |
| P2RY1  | DRD4    |
| CDC42  | MAPK14  |
| SETD7  | CHRM4   |
| HPRT1  | CHRM5   |
| CA1    | CHRM3   |
| POLA1  | MGLL    |
| FGF1   | CCR5    |
| OGA    | FABP4   |
| DNMT1  | FABP3   |
| PAX8   | PTGS1   |
| TYMP   | HSD11B1 |
| TK2    | PPARG   |
| PNP    | CNR1    |
| FGF2   | FFAR1   |
| ERAP1  | FAAH    |
| OGT    | PTGS2   |
| GRK1   | PTPN1   |
| CA2    | PPARA   |
| LGALS9 | FABP5   |
| INMT   | FABP1   |
| LGALS3 | CES2    |
| LGALS1 | CYP17A1 |
| EHMT2  | PPARD   |
| MAP3K7 | CNR2    |
| HSPA1A | SCD     |
| PIN4   | NOS2    |
| PAM    | TNKS    |
| LPAR4  | PTGES   |

|          |         |
|----------|---------|
| LPAR6    | NR1H3   |
| WRN      | HRH3    |
| TNF      | NPY5R   |
| CES2     | ALOX5   |
| LPAR3    | HRH4    |
| PPP1CC   | CYP11B1 |
| PPM1B    | CYP11B2 |
| CES1     | IMPDH2  |
| PPID     | HTR2A   |
| TLR2     | OPRD1   |
| PRNP     | ROCK2   |
| LPAR1    | GCK     |
| P2RY10   | GRIN1   |
| MPEG1    | HTR6    |
| PLA2G2C  | C5AR1   |
| GPR174   | QPCT    |
| SLC25A20 | GABRA3  |
| GPR34    | GABRA1  |
| POLM     | GCGR    |
| PLA2G4B  | GRIN2B  |
| GNAI1    | GABRA2  |
| GNAI3    | SLC6A9  |
| DNM1     | LIMK2   |
| ADH7     | HTR2C   |
| ACER2    | CALCRL  |
| POLH     | GPR119  |
| COL4A3BP | SRC     |
| FAAH     | KIF11   |
| LPAR2    | EPHB4   |

|         |         |
|---------|---------|
| PLA2G5  | ALOX5AP |
| EPHX1   | ASAH1   |
| POLK    | CRHR1   |
| GNAO1   | CDC7    |
| FDPS    | ABL1    |
| KDM5A   | YES1    |
| GGPS1   | LCK     |
| PAOX    | AURKB   |
| PRKCA   | PFKFB3  |
| EPHX2   | SLC9A1  |
| SMPD2   | JAK2    |
| ADH1B   | PARP2   |
| ENPP2   | RAMP1   |
| ACP1    | FLT1    |
| SPHK1   | APH1B   |
| NAAA    | PAM     |
| POLL    | SIRT2   |
| S1PR2   | PRKCA   |
| KAT2B   | PRKCQ   |
| CDC25B  | PRKCH   |
| HAO1    | PRKCG   |
| PLA2G4C | UGT2B7  |
| CNR1    | HMGCR   |
| NOD1    | PRKCE   |
| PLA2G2A | CPT1A   |
| FABP3   | VDR     |
| GBA2    | OPRK1   |
| THRA    | POLA1   |
| ADH1C   | AKT1    |

PTPN13  
THRB  
FUT7  
CDC25C  
ADH1A  
IARS  
CNR2  
VEGFA  
ASAH1  
HSD17B3  
DAGLA  
TRPV1  
SLC22A8  
HMGCR  
PGA5  
S1PR3  
PTPRC  
SLC22A6  
RARB  
PLCG2  
PPARG  
SELP  
TOP2A  
LPAR5  
APEX1  
PPARA  
S1PR4  
CDC25A  
CA3

PRKCD  
PREP  
AR  
HSD17B2  
SERPINA6  
PRSS1  
TRPV1  
SHBG  
AKR1C3  
AKR1C2  
AKR1C1  
ABCB1  
NR3C1  
DNM1  
ACACB  
MET  
LPAR6  
LPAR5  
NLRP3  
BACE2  
CTSD  
S1PR3  
S1PR1  
PTPN2  
ENPP2  
G6PD  
ESR2  
NPC1L1  
ESR1

|         |           |
|---------|-----------|
| CA7     | PTPN6     |
| GPR84   | PTGER1    |
| BBOX1   | PTGER2    |
| OXER1   | CYP51A1   |
| CYP4F2  | CDC25A    |
| GABRQ   | RORA      |
| KDM7A   | CDC25B    |
| PHF8    | RORC      |
| GSTK1   | BCHE      |
| BHMT    | BACE1     |
| SLCO2A1 | PTGER4    |
| SELL    | PTGIR     |
| SLC6A11 | HSD11B2   |
| LTB4R   | PGR       |
| GSTM1   | FNTA FNTB |
| KDM2A   | PTPN11    |
| KDM4A   | AKR1B10   |
| KDM4C   | POLB      |
| PTGER2  | PTPRF     |
| GSR     | PLA2G1B   |
| TBXAS1  | ACP1      |
| ENPEP   | SREBF2    |
| PLA2G10 | TERT      |
| S1PR5   | FDFT1     |
| TBXA2R  | SLC6A4    |
| FOLH1   | NR3C2     |
| PTGER4  | CYP2C19   |
| PTGIR   | CD81      |
| PLA2G4A | TOP2A     |

|          |           |
|----------|-----------|
| FFAR4    | PTGFR     |
| SLC22A1  | PTGER3    |
| GSTA1    | SLC22A6   |
| GABBR2   | TOP1      |
| GABBR1   | SLC6A2    |
| PTGER3   | PTGDR     |
| FABP4    | SAE1 UBA2 |
| PTGFR    | SRD5A2    |
| LAP3     | ACHE      |
| GPR35    | NR1H2     |
| ATG4B    | NR1I3     |
| KDM4E    | GLRA1     |
| GABRR1   | SQLE      |
| PPARD    | DHCR7     |
| S1PR1    | DRD2      |
| KDM5C    | SHH       |
| CPT2     | PHLPP1    |
| PAFAH1B2 | ILK       |
| KAT5     | PSEN1     |
| SPTLC1   | AURKA     |
| SPTLC2   | CCKAR     |
| Ephx1    | PDK1      |
| MGLL     | PDE10A    |
| PRKCE    | HTR1A     |
| ABCC2    | STS       |
| SOAT2    | CTSS      |
| ALOX5    | JAK3      |
| FFAR1    | JAK1      |
| ALOX12   | FASN      |



|          |         |
|----------|---------|
| SPHK2    | TACR2   |
| STS      | TACR1   |
| CYP17A1  | HTR1B   |
| NPC1L1   | HTR1D   |
| GPBAR1   | MCHR1   |
| SRD5A2   | MDM4    |
| SLC10A1  | MDM2    |
| G6PD     | CA7     |
| SHBG     | CA3     |
| SERPINA6 | CA6     |
| SRD5A1   | CA4     |
| ABCC4    | CA13    |
| CD4      | CA5B    |
| CDC45    | CA5A    |
| GC       | NFKB1   |
| ST3GAL1  | MAOA    |
| VDR      | NQO1    |
| NR1H3    | XDH     |
| NR1H4    | EGFR    |
| AR       | FABP2   |
| ESR2     | PHF8    |
| RORA     | NR1H4   |
| CYP24A1  | HSD17B3 |
| SLC10A2  | GABBR1  |
| ABCB11   | KDM2A   |
| CYP19A1  | KDM5C   |
| SREBF2   | GPBAR1  |
| ESR1     | GABRB2  |
| GABRD    | HAO1    |

|         |          |
|---------|----------|
| EBP     | GSTK1    |
| EPHA7   | LTA4H    |
| CYP27B1 | NR0B2    |
| EPHA2   | CDC45    |
| EPHA5   | PTPRC    |
| EPHA4   | RXRA     |
| EPHA8   | CYP26A1  |
| EPHB3   | CYP26B1  |
| EPHB1   | RARG     |
| EPHA1   | RARB     |
| EPHA6   | RARA     |
| SLC22A3 | FFAR4    |
| SHH     | CACNA2D1 |
| EPHB2   | RXRG     |
| RORC    | ALOX15   |
| UGCG    | ALOX12   |
| EPHB6   | RXRB     |
| ABCB1   | SLC16A1  |
| NR1H2   | ABCC1    |
| PHLPP1  | EPHX2    |
| TPPA    | CHRNA7   |
| AKT1    | PLG      |
| IL2     | TBXA2R   |
| Ar      | PLA2G4A  |
| CA5B    | HTR2B    |
| CA6     | RORB     |
| CA5A    | UBA2     |
| CA4     | SAE1     |
| KCNA7   | GRM5     |

KCNA1  
CA13  
MAOB  
KCNA4  
NQO1  
KCNA2  
KCNA3  
PCSK7  
PGR  
AHR  
KCNN1  
NFKB1  
CYP1B1  
MAOA  
HNF4A  
KCNN2  
DRD4  
MIF  
KCNA5

HNF4A  
LTB4R  
PDE4D  
SLC22A12  
PTGDR2  
IL6  
GLUL  
ADRA2B  
EDNRA  
MAPK3  
TRPM8  
APH1A  
NCSTN  
PSENEN  
PSEN2  
CMA1  
CTSG  
GRM2  
OXER1  
PDE4A  
RBP4  
METAP1  
MMP2  
PTGES2  
PRKAA2  
PRKAB1  
PRKAG1  
PDE4B  
ITGB2

ICAM1  
ITGAL  
MPEG1  
SLC1A1  
F2R  
DCK
