# Supplementary material for: Network pharmacology of bioactives from Sorghum bicolor with targets related to diabetes mellitus
Source: PubMed Central journal article supplement (PMC7774932; doi:10.1371/journal.pone.0240873), 2020-12-31
Supplement: pone.0240873.s002.pdf [file pone.0240873.s002.pdf]

**A list of 4,736 genes related to Type2 diabetes**

---

D7CNTP

ALPQTL2

ANON1

BCC1

BMND3

MLM

DNS

CMM

CCV

CTRCT8

DYX8

HLM2

ERPL1

IBD7

MS4

MYP14

PSORS7

PTPRZ2

MTS1

TFS1

SAI1

MRS

SAMD11

NIR

NOC2L

HES4

IMD38

IFI15

G1P2  
ISG15  
CMS8  
AGRN  
GITR  
AITR  
TNFRSF18  
TNFRSF4  
TXGP1L  
OX40  
ACT35  
IMD16  
CAB45  
SDF4  
B3GALT6  
ALGAZ  
EDSSPD2  
SEMDJL1  
C1QTNF12  
C1QDC2  
FAM132A  
SCNN1D  
RC68  
INTS11  
CPSF3L  
CPTP  
GLTPD1  
T1R3  
TAS1R3

DRS2  
DVL1  
ASP3  
MXRA8  
CCNL2  
MRPL20  
WARP  
VWA1  
KIAA1273  
TOB3  
ATAD3B  
PHRINL  
ATAD3A  
HAYOS  
SCA21  
C1orf70  
TMEM240  
SSU72  
MIB2  
MMP22  
MMP23B  
CDK11  
P58  
CDC2L1  
CDK11B  
MMP23A  
MMP21  
MIFR  
CDC2L2

CDK11A  
NADK  
GNB1  
MRD42  
GABRD  
GEFSP5  
EIG10  
EJM7  
PKC2  
PRKCZ  
C1orf86  
FAAP20  
SGS  
SKI  
KONDS  
PEX10  
NALD  
PBD6A  
PBD6B  
PLCH2  
PLCL4  
PANK4  
HES5  
TR2  
HVEM  
TNFRSF14  
SEP  
NL1  
NEP2

NEPII  
MMEL1  
ARPM2  
ARPT2  
ACTRT2  
CMD1LL  
LVNC8  
MEL1  
PRDM16  
EGFL3  
MEGF6  
FAM79A  
TPRG1L  
TP73  
VEL  
SMIM1  
JBTS25  
KIAA0562  
GLYBP  
CEP104  
DFNB96  
SLSN4  
NPHP4  
KCNA2B  
KCNA2B  
CHD5  
EAP  
RPL22  
C1orf188

RNF207  
ICMT  
GPR153  
BACH  
LACH  
ACOT7  
HES2  
ESPN  
USH1M  
TNFRSF25  
TNFRSF12  
DR3  
LARD  
PLEKHG5  
CMTRIC  
DSMA4  
KIAA0720  
T1R1  
TAS1R1  
HKR3  
ZBTB48  
CANPMR  
KIAA0833  
CAMTA1  
GLC3B  
SCZD12  
VAMP3  
FASPS3  
PER3

CD137  
ILA  
TNFRSF9  
PARK7  
DJ1  
RALT  
MIG6  
IDDNPF  
DNB5  
SLC45A1  
RERE  
NEDBEH  
ENO1  
PPH  
MPB1  
CA6  
SLC2A7  
GLUT7  
SLC2A5  
GLUT5  
H6PD  
GDH  
G6PDH  
CORTRD1  
SPSB  
SSB1  
SLC25A33  
PIK3CD  
APDS

IMD14  
CLSTN1  
KIAA0911  
CTNNBIP1  
ICAT  
LZIC  
NMNAT1  
NMNAT  
PNAT1  
LCA9  
UBE4B  
UFD2A  
KIAA0684  
KIF1B  
CMT2A  
CMT2A1  
NBLST1  
PGD  
APITD1  
CORT  
DFFA  
DFF1  
PEX14  
PBD13A  
CASZ1  
SRG  
TARDBP  
TDP43  
ALS10



MASP2  
SRM  
SPS1  
EXOSC10  
PMSCCL2  
MTOR  
FRAP1  
SKS  
ANGPTL7  
CDT6  
UBIAD1  
TERE1  
SCCD  
DISP3  
PTCHD2  
KIAA1337  
FBXO2  
FBX2  
FBG1  
NFB42  
FBXO44  
FBX44  
FBX6A  
FBG3  
FBXO6  
FBX6  
FBG2  
MAD2L2  
MAD2B

FANCV  
MTHFR  
CLCN6  
NPPA  
PND  
ANP  
ATFB6  
NPPB  
BNP  
PLOD1  
LH1  
LLH  
EDSKCL1  
MFN2  
KIAA0214  
CMT2A2A  
HMSN6A  
MIIP  
IIP45  
TNFRSF8  
CD30  
D1S166E  
TNFRSF1B  
TNFR2  
TNFBR  
VPS13D  
SCAR4  
GBD2  
DHRS3

RETSDR1  
LRRRC38  
PDPN  
T11A  
T1A2  
GP36  
PRDM2  
RIZ  
KAZN  
EFHD2  
SWS1  
CTRC  
CLCR  
CELA2A  
ELA2A  
AOMS4  
CELA2B  
ELA2B  
CASP9  
APAF3  
AGMAT  
AUH  
RSC1A1  
RS1  
PLEKHM2  
SKIP  
KIAA0842  
FBLP1  
MIGFILIN

ATRST2  
SPEN  
MINT  
SHARP  
HIAA0929  
ANIB3  
EA8  
ZBTB17  
ZNF151  
MIZ1  
CMT2A2B  
HSPB7  
CVHSP  
CLCNKA  
CLCNKB  
EPHA2  
ECK  
CTPP1  
CTPA  
FBXO42  
FBX42  
KIAA1332  
NECAP2  
NBPF1  
KIAA1693  
RNU1A  
RNU1  
TRNAE1  
TRNE

TRE  
OTS8  
AGGRUS  
CROCC  
ROOTLETIN  
KIAA0445  
MFAP2  
MAGP  
MAGP1  
ATP13A2  
PARK9  
KRPPD  
SPG78  
SDHB  
SDH2  
SDHIP  
PGL4  
PADI2  
PADI1  
PADI3  
UHS1  
PADI4  
PADI5  
PAD  
PADI6  
PREMBL2  
ARHGEF10L  
GRINCHGEF  
KIAA1626

PAX7  
RMS2  
MYOSCO  
TAS1R2  
T1R2  
ALDH4A1  
ALDH4  
P5CDH  
UBR4  
ZUBR1  
RBAF600  
KIAA1307  
EMC1  
KIAA0090  
CAVIPMR  
ARCC2  
CTRCT6  
AKR7A3  
AFAR2  
AKR7A2  
AKR7  
AFAR  
PQLC2  
CAPZB  
CAPPB  
MICOS10  
MINOS1  
MIO10  
MIC10

D1S1733E  
DAN  
HTR6  
RNF186  
OTUD3  
KIAA0459  
PLA2G2E  
PLA2G2A  
PLA2B  
PLA2L  
MOM1  
PLA2G5  
FRFB  
BFIS4  
BFIC4  
PLA2G2D  
SPLASH  
PLA2G2F  
UBXN10  
MUL1  
MULAN  
C1orf166  
CDA  
PINK1  
PARK6  
DDOST  
OST  
OST48  
CDG1R

KIF17  
KIAA1405  
INS  
PPARG  
CP  
RAC1  
APPL1  
EIF2S3  
FN1  
SIRT1  
IRS1  
LEPR  
ATP6  
POMC  
PON1  
PTGS2  
SOD1  
CAT  
NR1I2  
ADIPOQ  
AOC3  
IL2RA  
PAX6  
CYBB  
NR1I3  
MAP3K5  
MT2A  
NCF1  
CPT1A



MAFA  
ALPK1  
KIF1A  
THBS2  
ADRB1  
GAD1  
GLP1R  
ZFP57  
KIF5B  
SERPINE1  
PPARA  
NR0B2  
CLOCK  
PTEN  
ARNTL  
ABCG2  
ICA1  
PROM1  
SLC22A12  
LRP1  
CDKN2A  
SLC19A2  
CFTR  
GLIS3  
F7  
FXN  
PTPN22  
GCK  
GCKR

HFE  
HLA-DQB1  
HLA-DRB1  
HNF4A  
APOE  
IGF1R  
IL6  
AQP1  
AQP4  
INSR  
PDX1  
KCNJ11  
LMNA  
LPA  
ASIP  
PAX4  
IFIH1  
STAT3  
ABCC8  
HNF1A  
HNF1B  
TCF7L2  
TP53  
UMOD  
WFS1  
FTO  
CASR  
APOA5  
FOXP3

HAMP  
CDKN2B-AS1  
ATM  
HLA-B  
COX2  
CISD2  
BRCA1  
GATA6  
LIPC  
BMP2  
CAV1  
PNPLA2  
SPINK1  
CUBN  
DNM1L  
GATA3  
GJA1  
ARG1  
TRNL1  
MLXIPL  
PRKAR1A  
DNAJC3  
WRN  
CNBP  
ELN  
BSCL2  
SLC25A4  
AIRE  
ITPR3

KRAS  
LIPE  
ZFH3  
IER3IP1  
PLIN1  
BLK  
AGPAT2  
CPS1  
FOXC2  
FOS  
PTF1A  
GNAS  
HBB  
NDUFS7  
SMAD4  
COX1  
CYTB  
ND1  
ND5  
PRKAG2  
PDE4D  
PIK3R1  
SLC29A3  
PRSS1  
SLC22A2  
BRCA2  
TLR1  
C2  
SLC30A3

DCAF17  
MKKS  
HS6ST1  
FADS2  
ADA  
ZGLP1  
HPN-AS1  
CERT1  
LIPC-AS1  
LOC102723407  
ADAR  
RNASEH2A  
TXNIP  
CETP  
HPSE  
PPARGC1A  
TRIM31  
CAPN10  
POLG2  
TREX1  
NLRP3  
NDUFA11  
GJB4  
RBM45  
PLEKHH2  
CPA1  
CRP  
PARP1  
MAPK14

CST3  
HJV  
CCN2  
CTLA4  
CTNNB1  
ADRB3  
CYP2C19  
CYP21A2  
DAB2  
DBP  
ACE  
DECR1  
SLC30A8  
DKC1  
AGER  
DPP4  
ATN1  
AGT  
DSPP  
AGTR1  
ABCA1  
EDN1  
CELSR2  
AHSG  
UBR1  
PDILT  
EPO  
AKT1  
ALB

FABP4  
ALDH2  
FGF2  
PALLD  
FOXO1  
AKR1B1  
SIK3  
ZFYVE26  
LEMD3  
PLA2G15  
TMEFF2  
KDSR  
GABPA  
PCSK9  
WDR72  
GAD2  
NDUFAF3  
SAMHD1  
COPD  
ZBTB20  
TINF2  
GATM  
FGF21  
GCG  
GCGR  
GH1  
GIP  
GJB3  
GLO1

GLUL  
ABO  
OR10A4  
CAVIN1  
NSMCE2  
GPT  
GPX1  
NDUFAF4  
CD274  
GSK3B  
GSTM1  
GRHL1  
HGF  
HIF1A  
HLA-A  
HLA-DQA1  
HMGB1  
HMOX1  
HP  
HPN  
APOA1  
IAPP  
APOB  
ICAM1  
IDE  
GOLGA6A  
APOC3  
IFNG  
IGF1



IGFBP3  
APRT  
IL1A  
IL1B  
IL1RN  
IL4  
CXCL8  
IL10  
IL17A  
IL18  
ITPK1  
KCNQ1  
LCN2  
LDLR  
LEP  
LGALS3  
LHX1  
FADS1  
LINC02694  
LPL  
LRP6  
ARSA  
MBL2  
MC4R  
MFAP1  
MMP2  
MMP9  
MPO  
TRNC

COX3  
ND2  
ND3  
ND6  
TRNF  
TRNK  
TRNQ  
TRNS1  
TRNS2  
TRNV  
TRNW  
NDP  
NDUFA1  
NDUFA6  
NDUFB3  
NDUFB9  
NDUFB10  
NDUFS1  
NDUFS2  
NDUFS3  
NDUFV1  
NDUFS4  
NDUFS6  
NDUFS8  
NDUFV2  
NEUROD1  
NFATC1  
NFE2L2  
NGF

NHS  
NOS3  
NPY  
ATP2B1  
OPA1  
TNFRSF11B  
RRM2B  
NOX4  
NEUROG3  
PARN  
PDE11A  
TPRKB  
ADIPOR1  
NDUFAF1  
TIMMDC1  
POLK  
ENPP1  
RTEL1  
SERPINF1  
PEX1  
PEX6  
PIK3CA  
PIK3CB  
PIK3CG  
PLCG1  
PLG  
PMM2  
POLD1  
POLG

SEMA5B  
CCHCR1  
NDUFB11  
BCAS3  
CDKAL1  
SARS2  
AVP  
WRAP53  
RCBTB1  
CHDH  
NOP10  
SLC30A10  
MAML3  
FOXRED1  
ZCCHC8  
CARMIL1  
PRKAA1  
PRKAA2  
PRKAB1  
NHP2  
PRKACA  
TMEM126B  
ACSS2  
ANGPTL8  
MAPK1  
MAPK8  
PRSS2  
TWNK  
RETN

PTH  
SHROOM3  
SUGP1  
BBS1  
BBS2  
MOK  
BCHE  
ACE2  
RBP4  
REN  
RENBP  
ROS1  
BDNF  
BGLAP  
CCL2  
CXCL12  
ELMO2  
CDH23  
SLC39A8  
SI  
ST3GAL4  
SLC2A1  
SLC2A2  
SLC2A4  
SLC5A1  
SLC5A2  
SLC34A1  
SOD2  
SPP1

TERC  
TGFB1  
TLR4  
TNF  
TTPA  
C9  
UCP1  
UCP2  
UCP3  
VEGFA  
BEST1  
TRPV1  
XRCC4  
CAD  
NDUFAF5  
CCDC28B  
RNASEH2B  
USB1  
PALB2  
ARMC5  
EHMT1  
CTC1  
NUBPL  
PNPLA3  
THSD7B  
HMGA2  
OR2B2  
OR12D3  
GPR101

CASP3  
PIP5K1B  
ARL6  
RNASEH2C  
ACCS  
LMNB2  
PDE8B  
IRS2  
ALDH1A2  
ZPR1  
MGAM  
SELENBP1  
BAZ1B  
AIP  
USP8  
UBXN11  
NDUFAF2  
UBE2Q2  
KL  
FOXP2  
EIF2AK3  
CD34  
CD36  
GDF15  
RAPGEF5  
ADAMTS13  
CYP2E1  
CYP3A4  
EGFR

ALOX15  
GHR  
IFNA1  
IFNA13  
P2RX7  
P2RY12  
SST  
TAC1  
VWF  
PDHX  
FGF23  
ATP6AP2  
AHSA1  
IGF2BP2  
UTS2  
ADM  
CRK  
AFP  
DMPK  
FABP2  
SIRT3  
DIANPH  
RNF19A  
POLDIP2  
HPGDS  
ANGPT1  
GSR  
HHEX  
HSD11B1



HSPD1  
APP  
MALAT1  
SOST  
BCL2  
SREBF1  
TCF7  
TRBV20OR9-2  
CALCA  
AIMP2  
KLF11  
INSM2  
SOCS3  
GRAP2  
ADH1B  
DDIT3  
EGR1  
F3  
RFX6  
GAST  
MSTN  
GFAP  
GSTT1  
IGF2  
IGFBP2  
KLK3  
LAD1  
MME  
HSPA14

PLAT  
PPARD  
PYY  
PTPN6  
G6PC2  
PTPRN  
REG1A  
S100A8  
S100B  
SELE  
SGK1  
TLR2  
TRPM2  
VCAM1  
PLA2G7  
ADIPOR2  
APOL1  
TNFSF10  
CCK  
APLN  
CD59  
C20orf181  
AKR1A1  
CEL  
OGA  
NQO1  
DMD  
FBL  
F2

PTK2B  
G6PC  
GNB3  
ANGPT2  
ANPEP  
HBA1  
AOC2  
FOXA2  
HSPA5  
IL2  
CXCL10  
KDR  
KNG1  
LTA  
MAP6  
MAPT  
NFKB1  
NOS2  
ACR  
IL22  
SERPINA5  
SIRT6  
PDK4  
PLXNA2  
PRKCB  
SCD  
SOAT1  
SPARC  
CCR2

VEGFC  
XBP1  
CXCR4  
RUNX2  
SOCS1  
HDAC3  
NTN1  
FGF19  
NAMPT  
PERCC1  
SORBS1  
MTCO2P12  
PSIP1  
SORCS1  
CCR5  
CNR1  
PPARGC1B  
CPOX  
CTSD  
CUX1  
CYBA  
ADRB2  
DPT  
AGRP  
ERBB2  
JAZF1  
MMRN1  
CLEC16A  
ANGPTL2

SMUG1  
AMBP  
SLC17A5  
HAVCR1  
SIGLEC7  
ANGPTL3  
IFNL3  
BTBD8  
NR3C1  
NRG1  
HSPA4  
HSPB1  
HSP90AA1  
APOA4  
IGFBP1  
INPPL1  
ISG20  
JAK2  
GSTK1  
MET  
ATF4  
NUCB2  
OLR1  
P4HB  
PAEP  
PCK1  
PCK2  
PECAM1  
PRKCA

APOM  
MAPK7  
B2M  
PTPRN2  
PTX3  
ACTB  
S100A1  
SORT1  
S100A9  
CCL5  
SFRP5  
BMP7  
BTF3P11  
TFPI  
TFRC  
THBS1  
TSPO  
TIMP1  
DHX40  
SPX  
CNDP1  
TNFSF11  
PDE5A  
BECN1  
TRMT10A  
ENTPD1  
CD68  
NAT2  
LINC01672

MICA  
ABCB6  
ERVK-18  
TRIM13  
CEACAM5  
CECR  
RN7SL263P  
CHGA  
WDHD1  
TREH  
FBXO32  
CLU  
SLCO6A1  
CREBBP  
GPR119  
CSF2  
CSF3  
CYP2C9  
GRK2  
CYP2J2  
CYP11B2  
DNMT1  
JAG1  
AGTR2  
EDNRA  
AHR  
AKT2  
ERN1  
ACSL1

ATF6  
SIRT2  
DKK1  
FOXO1  
FLNA  
NR5A2  
GAP43  
GAPDH  
GFER  
GGT1  
GIPR  
NOX1  
GOT2  
SETD2  
GSTP1  
ANXA1  
HCLS1  
HCRT  
HK2  
HLA-C  
MNX1  
HMGA1  
AGFG1  
HSPB2  
IARS1  
HCAR2  
CCN1  
IL2RB  
KLK1



SUMO4  
LGALS1  
LOX  
LRP2  
SMAD2  
SMAD3  
MGP  
MMP1  
MMP3  
MMP14  
NOTCH1  
NPPC  
REG3A  
PRKN  
ANGPTL4  
ADA2  
ACP1  
PON2  
POR  
SELENOS  
MAPK3  
TRIB3  
BAX  
S100A12  
SELP  
FN3K  
HHIP  
SLC6A2  
SLC9A3

SNCA  
STAT5B  
STK11  
BRS3  
TCF3  
TH  
TKT  
TM7SF2  
TNFRSF1A  
TRAF6  
TRPC6  
TTR  
TXN  
UCHL1  
VPS51  
NPHS2  
NOX5  
PPP1R3B  
KMT2D  
CALR  
FZD4  
CASP8  
RPAIN  
TRIM63  
OGT  
DEGS1  
KHSRP  
PEA15  
RIPK1

HSPB3  
ARTN  
IL33  
PPIG  
CD38  
CARTPT  
ABCG1  
NOS1AP  
DCAF1  
DGCR2  
FOXO6  
KIR2DS2  
SH2B3  
PPIF  
PGR-AS1  
CDK4  
CDKN1C  
TUBB4B  
FST  
ADCY5  
CHI3L1  
PRRT2  
CHRM3  
TNDM1  
C1QTNF5  
CMKLR1  
CNTF  
COL9A3  
COMT

COPA  
ADORA1  
CPE  
TRPM6  
CSN2  
NRG4  
CTSB  
ADRA2B  
CTSS  
CX3CR1  
CXADR  
CYP2B6  
CYP2D6  
CYP7A1  
CBLL2  
SLC35G1  
DCN  
DLD  
DYRK1A  
EDNRB  
ELANE  
ELK3  
ENO2  
EPHB1  
EPHB2  
ETV3  
FLT1  
CELA3B  
CABIN1

DDAH2  
DDAH1  
CD2AP  
AMPD1  
DESI1  
SGSM3  
GNAO1  
PSAT1  
CFH  
ACACA  
HLA-DPB1  
HLA-DQB2  
HRC  
HSPA1A  
HSPA1B  
IDDM7  
IFNAR1  
IL6R  
IL15  
INSRR  
ITGAM  
ITGB2  
KCNMA1  
KIR2DL2  
LNPEP  
ARR3  
MEN1  
MIP  
MMP8

MT1A  
MYD88  
CCN3  
ATP2A2  
OGG1  
PC  
GAL  
GP6  
PCSK1  
PDCD1  
ISYNA1  
IL23A  
PDR  
ARID4B  
PGF  
PGM1  
SERPINA1  
PIN1  
PKD1  
PLA2G1B  
UBASH3A  
PLTP  
TLR9  
PPIA  
TET2  
PPID  
SLC52A1  
PPP1R3C  
SLC47A1

IMPACT  
MEG3  
CISD1  
PRL  
PROX1  
SLC2A9  
ACKR3  
PSMD9  
PTHLH  
CIP2A  
RAF1  
IL21  
RARRES2  
TRPV4  
RYR2  
CFB  
BGN  
CCL4  
CCL21  
CXCL5  
SELL  
SELENOP  
SLC2A3  
SLC6A3  
CXADRP1  
SLC6A4  
GGTLC5P  
SLC22A1  
SMS

SPG7  
SYP  
ZEB1  
TEK  
TFAM  
TFE3  
TIMP2  
TIMP3  
TIMP4  
TNNI3  
GGTLC3  
GGT2  
TYK2  
GGTLC4P  
VIM  
ZFP36  
MANF  
ST8SIA4  
HDAC11  
ZC3H12A  
SLC2A10  
CANX  
CAPN1  
CASP1  
PLA2G6  
KAT2B  
CCKAR  
CDC123  
MUC16



CD86  
CD40  
SOX13  
CD40LG  
CD44  
BMS1  
KEAP1  
ELMO1  
TMX2-CTNND1  
CELA3A  
TSHZ1  
CDK5  
RIDA  
LOC102724197  
CDKN2B  
KLF2  
SEMA3A  
NOD1  
RACK1  
NSA2  
CEBPB  
HYOU1  
PRDX4  
CCT2  
SCGN  
KHDRBS1  
CXCR6  
CETN1  
NFAT5

TCFL5  
CTSC  
LILRB1  
SLC22A7  
KCNQ1OT1  
CHAT  
BTN2A1  
PDAP1  
DBA2  
UCN3  
C1QTNF3  
SLC26A9  
H3P10  
H3P40  
ADCYAP1  
MRGPRX3  
MRGPRX4  
ADD1  
NOXO1  
ADH1C  
COL1A1  
TMEM18  
COL11A2  
COMP  
KLF6  
GPR151  
ADORA2A  
COX8A  
ADORA2B

CPB1  
CRH  
CRMP1  
BPIFA2  
CRYZ  
CSE1L  
PWAR1  
C2CD4A  
CSTA  
LYPD4  
ADRA1A  
ADRA2A  
CTNND1  
PLB1  
CTSL  
CREBRF  
CYP1A1  
CYP8B1  
CYP27B1  
CD55  
SLC16A11  
TMPRSS6  
OXER1  
DDT  
DEFB1  
DHPS  
DIO2  
DPYD  
DPYS

DUSP1  
APLNR  
ECE1  
EIF5A  
CELA1  
CRTC2  
ZBTB7C  
EPOR  
ERBB3  
ERBB4  
ERCC2  
EREG  
ALAD  
ALCAM  
EZH2  
F2R  
F2RL1  
F8  
F10  
F11  
FABP1  
FAP  
FASN  
TPCN2  
FBN1  
FDPS  
GPRC6A  
FES  
FGFR4

FKBP4  
FKBP5  
FOXO3  
FLG  
FLII  
LPIN1  
FMO3  
PES1  
LPAR3  
DAPK2  
BACE1  
NUP62  
ALOX12  
ALOX5  
ALOX5AP  
PRPF6  
IL27  
FRMD3  
TXN2  
POC1A  
PAMR1  
MRGPRX1  
SH2B1  
AMD1  
GATA4  
AMD1P2  
GCH1  
AMH  
CBLIF

FETUB  
GJA3  
FOXD3  
GK  
INTU  
IL17B  
GCLC  
GLRX  
GPER1  
GPR35  
GPR42  
GRN  
TBK1  
GTF2H1  
GUSB  
GYPA  
GYPB  
GYPE  
GZMB  
ANXA2  
HAS2  
HDAC2  
ANXA6  
HLA-DQA2  
PRMT1  
HSF1  
XIAP  
HSPA9  
APOA2

GPIHBP1  
PWAR4  
IGFALS  
IGFBP7  
FAS  
IL3  
CXCR1  
IL13  
IMPDH2  
IRAK1  
ITPR1  
JUN  
JUND  
ENHO  
KCNJ1  
KISS1  
KRT5  
KRT16  
TBPL2  
C2CD4B  
LAMC2  
LAMP2  
LBP  
LCK  
LETM1  
LIF  
LIG4  
LRP5  
LINC01194

ARNT  
LYZ  
MAFD2  
MAS1  
MB  
MC3R  
MCL1  
MDM2  
MECP2  
MEF2A  
MEFV  
MIF  
MIAT  
VN1R17P  
GPR166P  
MSMB  
MST1  
MSX2  
MVD  
MYC  
MYH9  
ATF3  
NEFL  
NFKB2  
NFKBIA  
NGFR  
NIDDM2  
NNMT  
NOTCH3



NPHS1  
SLC11A2  
NRF1  
ATP2B2  
OGN  
P2RX3  
P2RY1  
IL20  
PAWR  
PBX1  
ASCC1  
PCNT  
DCTN4  
CYB5R4  
PCSK2  
TLR7  
PCYT1A  
DTL  
UFM1  
GHRL  
ATP5PF  
PGC  
PHB  
SLC25A3  
PLAG1  
PMP22  
ERRFI1  
TREM2  
PON3

KRT20  
ATR  
DLL4  
TRPM7  
ANO1  
SOX6  
STAP2  
KDM3A  
PAG1  
ZNF395  
PSPN  
PROC  
PROS1  
TRPV5  
PSMA6  
FAM20C  
CAMK1D  
PSPH  
JPH3  
PTGS1  
RAD1  
PVR  
PVT1  
UBL5  
LGR6  
BCL2A1  
RNASE3  
BACH2  
IGAN1

MBOAT4  
RPS6  
RPS6KB1  
SALL1  
SRL  
CCL11  
CCL20  
SRR  
CIDEA  
NOD2  
ABCG8  
COP1  
SFTPD  
SHC1  
EBF2  
BMP4  
SLC5A3  
SLC6A8  
BMP6  
SLC11A1  
SLC18A2  
BMP2  
SMPD1  
SNAI1  
SNAP25  
SOX2  
SP1  
TRIM21  
SSTR4

SSTR5  
ST2  
STAT1  
STAT5A  
STX4  
STXBP1  
STXBP3  
SULT1A1  
BSG  
BTC  
SYN2  
TACR1  
KLF9  
TAPBP  
TAT  
TBP  
TCF21  
TFF3  
TG  
TGM2  
TLR3  
TSPAN7  
TSPAN8  
TMSB4X  
TPD52  
TPO  
C3  
NR2C2  
TSC2

TTN  
TWIST1  
UBE2I  
UTRN  
VDAC1  
VGF  
WNT1  
YY1  
YWHAZ  
PTTG1IP  
ZMYM2  
AIR  
ALMS1  
TNDM  
SLC52A2  
CORO7  
VTCN1  
LIN28A  
CALCR  
NR4A3  
COL18A1  
SETD7  
SLC7A5  
TXNDC5  
TAM  
CAPN2  
MFRP  
ANGPTL6  
CCDC8

PLA2G10  
CASQ1  
PPP1R15B  
UBASH3B  
ABCC11  
DENR  
CAV3  
TP63  
IDDM17  
TNFRSF6B  
CES2  
ARHGEF7  
SQSTM1  
WASF1  
WNT3A  
F2RL3  
CD3E  
LPAR2  
SLC33A1  
GGTLC1  
MSC  
DNER  
CD14  
GPR55  
S1PR2  
CD19  
MS4A1  
KLF4  
CD163

GLP2R  
COX5A  
CD80  
AIM2  
TBPL1  
NPEPPS  
BCAR1  
CD69  
HDAC4  
A1BG  
HOTAIR  
SOD2-OT1  
HDAC6  
KIF28P  
BCL2L11  
IBD20  
INSL5  
H3C9P  
C4B\_2  
CDH5  
TMED7-TICAM2  
AAA1  
CHAF1A  
PARP2  
MAMLD1  
ARAP1-AS2  
OCLN  
VIM-AS1  
GJC1

RBM14-RBM4  
KLRC4-KLRK1  
ABCC5  
ERVK-20  
DNM3OS  
IL18BP  
PTPRU  
ARAP1-AS1  
CDH11  
OPN1MW3  
HIPK3  
CDH13  
RASGRP1  
LRPPRC  
MBNL2  
WASF2  
CDK2  
LINC01150  
EMSLR  
TRPM2-AS  
ADAM10  
NUTF2  
DDX39A  
GDF11  
MRPS31  
RABEPK  
ABCC4  
CDK2AP2  
CDKN1B



LOC102724334

CBSL

STUB1

SIGMAR1

TP53COR1

LANCL1

TNIP1

LAMC3

CDKN3

TFG

MICU1

CITED2

CORO2B

PEMT

CPQ

RAPGEF3

CD52

RBM14

LYPLA1

C1D

VAV3

TOMM40

TIMM44

CAP1

CARM1

CEBPA

SEMA4D

FBLN5

CIB2

DEAF1  
UBD  
THRA1/BTR  
CERNA3  
SLC35A1  
CCT4  
GNLY  
CENPA  
SLCO1B1  
SH2B2  
IVNS1ABP  
POSTN  
CST12P  
CELF1  
TNFSF13B  
GIPC1  
TRAF3IP2  
DHS  
NEK6  
SEPTIN9  
WASF3  
PGRMC1  
USP19  
MRPS30  
MALT1  
MMP24  
CPSF4  
ADCY3  
PAPOLA

SUB1  
RALBP1  
PRSS21  
BTG3  
PDIA5  
ERP29  
EBNA1BP2  
METAP2  
IMMT  
ERVK-32  
SLC27A2  
KIF2C  
LIAS  
RAPGEF4  
LOC110806263  
ESM1  
NUP42  
RPP14  
PTPRT  
FAF1  
SLC7A9  
LOC111674464  
CHIT1  
SLC2A6  
MAP4K5  
IRAK3  
AKAP13  
PTGDR2  
DUSP12

IL17F  
KLF12  
LINC02605  
SLCO2B1  
RBPJL  
SLC46A1  
STK38  
PHB2  
TUSC2  
AZIN2  
TMEM54  
LOC113664106  
CHRNA4  
ADCY8  
TXNRD3  
CYGB  
MYSM1  
C1QTNF7  
MARCHF3  
GPR146  
CISH  
H3P8  
H3P28  
H3P42  
SLC5A11  
CKM  
RMI2  
ERCC8  
ABHD15

SNAP47  
LRG1  
ARAP1  
TADA1  
THEM4  
DCD  
RLN3  
MSS51  
CLCN7  
CLK2  
SERPINA3  
CYP2R1  
CLPS  
PLIN2  
CCR1  
DEGS2  
ACKR2  
FOPNL  
LTB4R  
MSI2  
OSCAR  
CNP  
CNR2  
TSACC  
COL6A3  
WDR36  
TAAR1  
CPB2  
CPD

KLF14  
CLDN4  
CPT2  
CR2  
CREB1  
ATF2  
CREM  
FUNDC1  
UPRT  
CRY1  
HT  
SIRPA  
CS  
CACUL1  
CSF1  
CSF1R  
PIWIL4  
CSF2RA  
CSH1  
CSH2  
CSK  
SERPINA12  
WIPF2  
CILP2  
ZNF569  
CTAA1  
CTBS  
CTF1  
PDIK1L

CTNS  
SIK1  
CTRB1  
CTSG  
ERFE  
CTSK  
RMDN2  
UPP2  
KLB  
PPM1K  
CYC1  
SLC2A12  
CYP1A2  
AMOT  
CYP2D7  
LINC00599  
CYP3A5  
CYP4A11  
CYP24A1  
CYP27A1  
DAB1  
DGKQ  
DAPK1  
DAPK3  
SPRED1  
DBH  
MARCHF10  
DCX  
TLE5

DEFA1  
DEFA3  
SGMS2  
DES  
NLRP6  
PTCRA  
DIAPH1  
AFM  
DIH1  
DIO3  
DLAT  
DLX3  
AGA  
SARDH  
DMRT1  
DNAH8  
DNASE1  
DNM2  
DNMT3A  
DOCK3  
DSC3  
RCAN1  
DSG3  
HBEGF  
DUSP4  
DUSP9  
TOR1A  
E2F1  
EBF1



EDA  
S1PR1  
AIC  
EEF2  
EFNB2  
EGF  
EIF2S1  
ARID2  
PAOX  
EIF4E  
EIF4EBP1  
EIF4EBP2  
AIF1  
SERPINB1  
ELAVL2  
A2M  
ENG  
ENPEP  
PRSS55  
EP300  
NRK  
ERCC1  
ERG  
ESD  
ESRRA  
ALAS1  
ETS1  
EXT2  
F5

F9  
ALDH1A1  
FABP3  
FABP5  
FBLN1  
FAT1  
LRRRC55  
FOLH1B  
FBN2  
EFEMP1  
FBP1  
RANP1  
PHACTR1  
FCGRT  
HOXA11-AS  
GPC4  
FGB  
ABCD2  
FGF13  
FGFR1  
FGL1  
FHL1  
FHL2  
MRAS  
PUF60  
VASH1  
AAK1  
ANKRD26  
NLRP1

INPP5F  
CARD8  
SACM1L  
KLRK1  
MSRB2  
TPX2  
PDCD11  
UNC13A  
MYO16  
NFASC  
KDM6B  
PASK  
ATG4B  
TBC1D1  
NBEAL2  
FBXO28  
PLCB1  
PHLPP1  
FLT4  
MCF2L  
CUX2  
ZNF629  
SIRT4  
ABCB10  
FOLH1  
NPTXR  
TRAM1  
BRD4  
FOLR1

FOLR2  
NNT  
FOSB  
RBFOX2  
ELP5  
SH3BP1  
RAB38  
TMEM245  
PANX1  
ZNF318  
ALPI  
FSHMD1A  
ALPP  
NR5A1  
FUT2  
FNDC5  
ANGPTL5  
SLC37A4  
CNIH2  
TCERG1L  
NEGR1  
GCA  
TAF5  
ARIH1  
TPSG1  
BACE2  
PART1  
GALNS  
GALNT3

TPGS2  
KANK2  
TIPARP  
CHMP2B  
SNED1  
GORASP2  
TKFC  
ACOT11  
LRIT1  
GAS1  
GAS6  
PHGDH  
FBXO25  
FBXO8  
ANKRD2  
GBE1  
GAPDHS  
OPN1MW  
GDF2  
GREM1  
GDF10  
HS6ST3  
GDNF  
GEM  
GFPT1  
GHRH  
GHSR  
ABL2  
GJA4

GJA5  
ATP2C1  
LAT  
SND1  
FOXP1  
TAF5L  
CACYBP  
NAAA  
GLS2  
GLA  
HCAR1  
GPR162  
PDCD4  
RPS6KA6  
GLI2  
MAT2B  
TOR2A  
GLUD2  
GNAT1  
AMY2A  
GP1BA  
SLCO1B3  
ANG  
NEAT1  
CXCR3  
HECTD4  
KSR2  
CHAMP1  
UTS2R

ZNF763  
RSPO1  
MCHR1  
IGHD1-7  
DLL1  
TRBV7-8  
GPR39  
FFAR2  
GPX3  
GPX4  
GRIA2  
REM1  
DEXI  
LAMTOR2  
OSTM1  
FLVCR1  
DBNL  
GRIN1  
GRIN2A  
GRIN2B  
STXBP6  
CNIH4  
DROSHA  
GRM2  
GRM5  
CXCL1  
GSN  
GSTA4  
GTF2H4

TRPM5  
ICOS  
GPSM2  
EEF2K  
NME7  
SEC61A1  
GPR132  
NENF  
DSE  
CERS2  
NRBP1  
GYS1  
SH3KBP1  
H1-2  
HABP2  
HARS1  
HBG2  
HCRTR1  
ANXA5  
ERVW-1  
NT5C  
PIK3R4  
UBE2K  
HLA-DMA  
HLA-DMB  
HMGCS2  
NR4A1  
HNF4G  
ONECUT1



SLC29A2  
BPIFA4P  
HNRNPK  
HOXA3  
HOXC4  
APC  
APCS  
HPX  
MMAB  
HRH1  
HES1  
HSD3B1  
HSD11B2  
HSPA2  
HSP90AB1  
HSPG2  
NDST1  
HTC2  
HTR2A  
HTR2C  
TNC  
IBD2  
IBSP  
TMEM119  
BRINP3  
ARMH1  
ID1  
GADL1  
IDDM3

IDDM4  
TSPAN33  
VWA2  
IDDM11  
NANOS3  
CYCSP51  
IFNAR2  
SOX2-OT  
IGF2R  
IGFBP5  
APOH  
GPR142  
ZACN  
SLCO4C1  
TICAM2  
IL1R1  
IL4R  
IL6ST  
IL7  
IL7R  
IL9  
IL12B  
ACADSB  
IL15RA  
FOXK2  
ILF3  
ILK  
IMPDH1  
ING1

ING2  
AQP7  
INSL3  
INSM1  
IRF1  
AQP9  
IRF7  
ISL1  
ITGAX  
ITGB7  
ITIH1  
IVD  
JAK1  
JUNB  
AREG  
KCNC2  
KCNE1  
KCNH2  
KCNJ3  
KCNJ5  
KCNJ6  
KCNJ9  
KCNN4  
LINC-PINT  
KIR2DL3  
KIR3DL1  
KLKB1  
KRT8  
KRT18

TMEM189  
TMEM189-UBE2V1  
SERPINA13P  
LINC01550  
CCL4L1  
LIN28B  
KTN1  
C1QL3  
HES3  
LAMP1  
RPSA  
LCN1  
LCP1  
LDHB  
LGALS2  
LGALS3BP  
LGALS4  
SMIM10L2A  
LOXL2  
LRPAP1  
GTF2H5  
LTBR  
MXD1  
SMAD1  
ARRB2  
SMAD7  
ASIC1  
STS  
MAP2

MBNL1  
MBP  
MC2R  
SMCP  
ADAM11  
DNAJB9  
MDH2  
MDM4  
MEOX2  
MFGE8  
MGAT2  
KITLG  
CXCL9  
MITF  
MLH1  
MAP3K9  
MAP3K10  
MLN  
FOXO4  
MMP10  
MNAT1  
MPG  
MPI  
MPST  
MPZ  
MRE11  
ABCC1  
MS  
RNASEK

CDNF  
MSH3  
MT1E  
MT1JP  
PLF  
MTM1  
MTTP  
MUC1  
MUSK  
MMUT  
MUTYH  
MYF6  
SERPINC1  
MYL2  
PPP1R12A  
NAB2  
NAGLU  
NUBP1  
NBN  
NCAM1  
NCK1  
NCL  
NDN  
ATIC  
NFATC3  
NFATC4  
NFIL3  
ATP12A  
NIDDM1

NINJ1  
NNAT  
NM  
NME1  
NOS1  
NOTCH2  
FXD2  
ATP2A1  
NRTN  
YBX1  
NTS  
NTSR1  
NUMA1  
TRIM72  
OAS3  
OAT  
ATP4A  
ODC1  
ODF1  
ORM1  
CLDN11  
OXA1L  
OXTR  
P2RX4  
P2RX5  
PA2G4  
FURIN  
PRDX1  
MBL3P

PAM  
PAPPA  
PAX2  
ASAP1  
AK3  
F11R  
PCBD1  
PCDH8  
TMED7  
TVP23B  
PCMT1  
TFB1M  
METTL9  
PCNA  
RMDN1  
INSIG2  
GLRX5  
MZB1  
NT5C3A  
CLEC1B  
PDB1  
PDC  
DACT1  
DCDC2  
HSD17B7  
PDE7A  
SIRT7  
RAB14  
PDGFRA



GDE1  
PIAS4  
TRIM33  
NBAS  
ATP6V1H  
SF3B6  
RASD1  
MPC1  
ZFR  
EMCN  
MAP3K20  
PER1  
PF4  
PF4V1  
SERPINB6  
PIM1  
PKLR  
PKM  
PKNOX1  
PLAGL1  
PLAUR  
PLCB3  
IL17D  
HDL3  
PLEK  
SERPINF2  
PLK1  
PLN  
PLXNA1

PNOC  
IL20RA  
SLCO1C1  
ACP5  
FAM3B  
H2BS1  
PODXL  
TREM1  
SIAE  
YIPF1  
MOV10L1  
POU1F1  
SMOX  
POU2F1  
APBB1IP  
POU2F2  
ROBO4  
DDIT4  
EPB41L4B  
POU4F1  
ARL15  
FEV  
FBLIM1  
CNNM2  
DYM  
VPS13C  
NCAPG2  
ACP3  
TUG1

MARCHF1  
MOCOS  
PPP1R3A  
MTPAP  
MSTO1  
RMDN3  
AVPR1A  
PTPA  
RHOT1  
FBXW7  
AVPR1B  
GIMAP5  
HEMGN  
PPY  
AVPR2  
PREP  
PLXNA3  
MIOX  
RNPC3  
ITLN1  
FERMT1  
SYBU  
ENAH  
PRKCD  
USE1  
ACOT13  
GSDMB  
GPRC5C  
ZC4H2

LANCL2  
NSFL1C  
MYDGF  
MAP2K3  
MAP2K6  
PCDHGA4  
ZNF253  
MASP1  
PRSS8  
CYP26B1  
ASAH2  
PSEN1  
PSEN2  
CLDND1  
SUCNR1  
SPHK2  
NMUR2  
ENY2  
CHPT1  
ADAMTS9  
BAAT  
AKR1B10  
COQ9  
PCBP4  
KMT5AP1  
GOPC  
PSMD7  
PSMD10  
PELI1

ADAMTSL3  
BAD  
PTBP1  
PTCH1  
PTGDS  
GJD2  
PTGIS  
HNP1  
AS3MT  
PTH1R  
AHRR  
SEMA6A  
CFAP97  
RNF213  
MARK4  
ZNF410  
PTPRD  
NEUROD4  
NECTIN1  
PCTP  
OPRPN  
ARHGAP22  
RAC2  
RAG2  
RAN  
RAPSN  
GER  
SCPEP1  
NPS

RBP3  
CCND1  
RCN2  
OPN1LW  
REG1B  
RELA  
REST  
RFC2  
RGS1  
RHD  
RHEB  
RHO  
RIT2  
RNASE2  
SLC25A19  
BRD2  
ELOVL5  
NIF3L1  
GAS5  
PROK2  
RNY1  
RNY3  
ROBO1  
ROCK1  
HCN2  
RP9  
BCR  
RPL10  
RPL29

RPL36A  
DELYQ11  
RPS6KA1  
HCC  
RPS19  
RREB1  
RXRG  
RZR3  
S100A10  
ACSM3  
SATB1  
CLEC11A  
SCN2A  
SCN7A  
SCN10A  
CCL16  
CCL22  
BID  
CXCL11  
SDC4  
THADA  
UBE2O  
PCIF1  
DMRTA1  
SELPLG  
SEMA3F  
TSPYL2  
LHPP  
TNMD

ECSCR  
STRA6  
ABCG5  
SRSF5  
SRSF6  
FBRS  
IKZF5  
SFTPB  
SFTPC  
SGCA  
SMIM10L2B  
GORASP1  
PDIA2  
WDR13  
MFSD1  
ST6GAL1  
GNPNAT1  
PMEL  
AGXT2  
SIX1  
SKP2  
SLC1A3  
RTN4R  
WNK1  
SLC3A1  
UBE2Z  
SLC5A5  
SFTPA1  
SLC7A2



SLC9A1  
SLC12A3  
SLC14A1  
SLC19A1  
SLC20A1  
SLC20A2  
SMARCA4  
CYP4F12  
SMO  
SNRNP70  
H3P37  
SOD3  
BNIP3L  
SORB  
SORL1  
SOS1  
SOX4  
SOX9  
DST  
SPINT1  
SPR  
SPRR2A  
AKR1D1  
SRY  
ITPRID2  
ST13  
ST14  
STAT2  
STAT4

STC1  
ELOVL4  
STIM1  
STX1A  
SUV39H1  
VAMP2  
SYT1  
SYT5  
ADAM17  
TAGLN  
KLF5  
TALDO1  
TAP1  
TAP2  
TBX1  
TBXA2R  
TCF4  
TCF19  
TRD  
BUB1  
TDGF1P3  
TDO2  
TERF1  
TGFA  
TGFB2  
TGFB3  
TGFB1  
TGFB1  
TGFB2

THBD  
THBS4  
THRA  
THRB  
KLF10  
TIE1  
C1QBP  
TJP1  
TLE1  
TLE3  
TLR5  
TNFAIP3  
TPM4  
CRISP2  
C4A  
C4B  
TRPC3  
INS-IGF2  
TSC1  
TSHR  
TST  
TTC4  
C5AR1  
POTEF  
OPN1MW2  
TNFSF4  
UBE2V1  
UCN  
UGCG

UPP1  
UPK2  
USF1  
KDM6A  
VASP  
VEGFB  
VHL  
EZR  
VIP  
VPREB1  
LAT2  
NSD2  
WNT2  
WNT5A  
WNT6  
WNT7A  
XBP1P1  
XK  
XPC  
XRCC1  
YES1  
SF1  
CACNA1A  
CACNA1E  
ZNF236  
DDR1  
PSS  
PXDN  
TUBA1A

PAX8  
FZD5  
SCG2  
SLMAP  
SLC25A20  
ASPSCR1  
MBOAT7  
FSD1  
DDX39B  
CALB1  
PAGR1  
NTT  
NAA16  
NLRX1  
FZD3  
SHCBP1  
VASH2  
CALM1  
BICC1  
ASRGL1  
MOGAT2  
STAM  
SCUBE1  
CDK5RAP3  
FLAD1  
PDGFD  
COASY  
CALM2  
ECB2

CALM3  
ZNF436  
AAAS  
KCNH6  
HBHR  
SLC38A1  
TSC22D4  
MAP1LC3B  
AKAP1  
MED25  
CAPN3  
UBL4A  
TKTL1  
CAPS  
CAST  
AXIN1  
BRAP  
CARS1  
ELOVL3  
SESN2  
CRISPLD2  
LOH19CR1  
KCNK16  
SETDB2  
FSD1L  
MIXL1  
MAGT1  
TAGLN2  
TKTL2

SLC41A2  
EEA1  
ASCC2  
NLRC5  
MEHMO  
SYVN1  
HOPX  
CUL1  
ZGPAT  
KISS1R  
SPZ1  
IRS4  
ATP5MD  
HAVCR2  
ORAI1  
PLXDC2  
ELP1  
CST7  
KRT90P  
LGR5  
MAPKAPK5  
GALP  
MADD  
STC2  
ABCB11  
NCOA1  
DYNLL1  
VAMP4  
CBLB

DGAT1  
HRK  
TNFSF14  
CBS  
FADD  
SIGLEC5  
TNFRSF11A  
TNFRSF10B  
SUCLA2  
TRIM24  
DPM1  
NRP1  
CCN5  
CCN4  
ASAP2  
CCKBR  
SPHK1  
FUBP1  
EIF2S2  
TRPA1  
UCN2  
CH25H  
KNSTRN  
BMF  
RPL14  
GPRC5A  
SLC7A7  
PYGO2  
MTA1



CD1D  
SLC16A4  
SLC16A3  
ARHGEF1  
PDCD5  
HGS  
PCSK7  
ARHGEF2  
RFT1  
TIMD4  
ARRDC4  
HACD1  
CTBP1-DT  
MTG1  
CD5L  
PTTG1  
NAF1  
NOG  
CD8A  
MFHAS1  
STK17B  
PIWIL1  
SLC38A5  
ACVR2B  
B4GALT5  
SLIT2  
LONP1  
CD27  
CIAO1

CD101  
CD28  
CYP7B1  
TP53INP1  
NCR1  
MAP4K4  
CD33  
HOMER1  
FHL5  
PCYT1B  
CHST3  
ROCK2  
NAPSA  
MAPK8IP1  
SCARB1  
ADAMTS4  
ADAMTS1  
GAL3ST1  
BAG3  
EI24  
CIR1  
CCL4L2  
PRDX6  
CD47  
IKBKE  
SOCS5  
LPIN2  
SEMA3E  
SART3

HDAC9  
ADGRE5  
RASSF2  
PIEZO1  
IP6K1  
GIT2  
TBC1D4  
NUAK1  
RNF10  
MVP  
TNFSF15  
CCS  
CDC42  
CDH1  
CASP8AP2  
HMG20A  
GPD2  
UBE2E2  
AP3S2  
MAEA  
GRB14  
PEPD  
CMIP  
ITGA1  
PLEKHA1  
ZFAND3  
DGKD  
CCND2  
PSMD6

NFATC2  
ZNF257  
CNKSR2  
JADE2  
AUTS2  
EPC2  
GP2  
IL13RA1  
RNF6  
SCTR  
SLC1A2  
BRAF  
FAM234A  
USP48  
VPS26A  
SFRP4  
SLC22A3  
HK1  
ATP2A3  
HLA-DRB5  
CCDC92  
CDO1  
NUS1  
TMEM155  
KCNU1  
SMAD5  
MAT1A  
NKX6-1  
ZC3HC1

BCL2L1  
S100A6  
BHMT  
TRPC1  
NFE2L1  
UGT1A6  
UGT1A1  
PRKCE  
MAPK9  
NR1D1  
CASP12  
FEM1B  
ACOT2  
ABCC2  
COL3A1  
CRHR1  
AANAT  
CYP11A1  
DAG1  
ARX  
ANKRD23  
AK1  
EPAS1  
ALDOB  
NCOA6  
SDF2L1  
HSD17B3  
KCNMB1  
PHOX2A

MKI67  
MTR  
OXCT1  
ATP5F1B  
PPP2CA  
PRKCI  
SCN1B  
SRC  
STAR  
CASP7  
MAP1LC3A  
GPT2  
EIF3F  
GADD45GIP1  
ANK1  
GRK5  
KIF11  
TM6SF2  
AGMO  
MAP2K7  
TFAP2B  
TMEM163  
DGKB  
COBLL1  
PRPF31  
LAMA1  
ALDH7A1  
POU5F1  
AHI1

ZMIZ1  
RBMS1  
ZRANB3  
PRC1  
MPHOSPH9  
TRDN  
CAMKK2  
TSBP1  
EHMT2  
SPPL3  
POC5  
NDUFAF6  
CTBP1  
LINGO2  
SLC16A13  
ADGRL3  
MACF1  
ALK  
ABCA4  
TTLL6  
RBPJ  
SNHG17  
MCM6  
TRPM1  
NRL  
OAS1  
GATAD2A  
POMGNT1  
BCL9

ROM1  
ATXN1  
SGCD  
SGCG  
SSR1  
TUB  
CLIP2  
DHDDS  
PBX4  
CAMK2G  
STX8  
NR2E3  
SUMO2P17  
HMGA2-AS1  
LINC00271  
LMCD1-AS1  
ENPP7P10  
OSER1-DT  
PROX1-AS1  
UBE2E2-AS1  
LINC01426  
LINC00844  
ADAMTS9-AS2  
PRC1-AS1  
ARPIN-AP3S2  
SCAANT1  
TSPAN3  
FRY  
HNF4A-AS1



LINC00824  
LINC02010  
PKN2-AS1  
C5orf67  
TSBP1-AS1  
LINC01339  
PABPC4-AS1  
ETS1-AS1  
HORMAD2-AS1  
TOPORS  
CALCOCO2  
RAMP2  
LINC02576  
DLEU1  
CCND2-AS1  
ADARB1  
MERTK  
LINC02841  
LINC02484  
LINC02030  
LINC01611  
PRPF8  
YKT6  
RAI1  
PNPLA6  
TRIOBP  
POLR3A  
NUDT6  
MGLL

CHUK  
OSBPL1A  
OSBPL7  
TTC8  
CYB5D2  
TTC39C  
CNGB1  
CNGA1  
EDARADD  
CHMP4B  
ZNF513  
ARL9  
SLC9B2  
SDHAF4  
UNC5D  
HGSNAT  
MAGEC3  
CRX  
ZSWIM3  
RFLNA  
BEST3  
RDH12  
RTN4RL1  
HORMAD2  
LINC01010  
C8orf37  
DARS1  
TTLL8  
RPSAP52

CLN8  
EYA2  
DLEU7  
FGF14  
CPEB3  
NLGN1  
RALY  
RAB3GAP1  
SNRNP200  
ZHX3  
ZZEF1  
CEP68  
FBXL7  
RPGRIPI1L  
ARHGEF18  
CRB1  
ABCB9  
ARL2BP  
AMACR  
GABRA4  
ST6GALNAC3  
GABRG3  
FSCN2  
SAMM50  
ABI3BP  
PTPN23  
OSBPL3  
GPSM1  
IFT172

VPS33B  
TBL2  
NSG1  
PALD1  
HNF1A-AS1  
C17orf58  
KIF9-AS1  
PPIL6  
ZNF775  
GTF2I  
GUCA1B  
PURG  
LRP12  
FSCN3  
HIVEP2  
HLA-DOB  
HLA-DRB9  
IDH3A  
IDH3B  
EYS  
CERKL  
KCNQ3  
PCARE  
CFAP77  
LIMK1  
LINC01344  
IL17REL  
LINC01122  
LINC02245

ARL3  
C16orf74  
MAK  
PIM3  
MCC  
ASCL2  
MOG  
ND4  
TRNH  
NEK2  
NFKBIL1  
NTRK2  
NTRK3  
SCAPER  
PCSK6  
IMPG2  
ASB3  
HSD17B12  
SNX7  
PDE6A  
ANKFY1  
PDE6G  
PEX5L  
PDE6B  
PLCD1  
LRP1B  
PELO  
PRRX1  
EXOC6

GIN1  
CNTLN  
TXNL4B  
PINX1  
SRBD1  
DARS2  
SBNO1  
PPP2R2C  
PRIM2  
INTS8  
MINDY1  
SPATA7  
UBAP2  
ARHGAP15  
KIZ  
KLHL7  
TEX14  
ANKH  
RELN  
C1GALT1  
PDSS2  
ATP8B2  
PTGFRN  
LRFN2  
GPR158  
STARD9  
PITPNM2  
UVSSA  
KIAA1549

SLC7A14  
NECTIN2  
SINHCAF  
SENP2  
PRPH2  
RFC1  
RGR  
RGS7  
RGS13  
RLBP1  
MRPS35  
AGBL5  
RP1  
RP2  
RPGR  
RPE65  
MRPL12  
SAG  
ATXN2  
ATXN7  
PIEZO2  
BLM  
XYLT1  
KIF9  
SEMA4A  
AKTIP  
YTHDC2  
ST3GAL3  
MLX

TGFBR3  
TNFAIP6  
TULP1  
ZBED3-AS1  
USH2A  
CLRN1  
VSNL1  
ZIC1  
ZSCAN20  
CA4  
PRCD  
GDAP1L1  
GCC1  
ZNF408  
THSD4  
SCD5  
CPED1  
PCNX2  
SPHKAP  
TNKS2  
ZNF34  
IFT88  
NPRL3  
LRMDA  
CTTNBP2  
FAM161A  
CHCHD6  
OFD1  
OASL



PABPC4  
MTMR3  
CCDC149  
PRPF4  
PRPF3  
CCNQ  
CDHR1  
LRAT  
REEP6  
NRXN3  
NRXN1  
ZNF101  
MED23  
GTF2IRD1  
CELSR1  
WSCD2  
DEPDC5  
UBE3C  
DOCK4  
IFT140  
DHX38  
MTSS1  
SF1  
MAGI2  
FCHSD2  
RHOTB1  
RBM19  
USP3  
BCL11A

SLC2A11  
CRY2  
TMBIM4  
SAT1  
STAM2  
FANCD2  
IL37  
PYCARD  
HDLBP  
IL5  
DPPA3  
KCNJ4  
HEBP1  
AZU1  
SULT1E1  
HIRA  
SLBP  
LPAL2  
XPR1  
LIPG  
ARHGEF11  
RNU1-1  
GPD1  
RAPGEF1  
C1QTNF9  
NPC1  
TAS2R13  
PDE3B  
METRN

SLC39A7  
PTGES2  
SNAP23  
EBI3  
CDK9  
SPRY2  
C1QTNF1  
CMA1  
CYP2C18  
PHOSPHO1  
TIMM8A  
DRD2  
TMEM154  
ENSA  
FCGR3A  
FCGR3B  
ERP44  
SIRT5  
CERS6  
POU2F3  
C5AR2  
METRNL  
GRB10  
HCCS  
MCIDAS  
APOD  
ITGA2  
ITGA2B  
KCNJ15

RNR2  
OSM  
TNFRSF12A  
PGR  
PARL  
CENPJ  
PRKG1  
PRTN3  
CCNL1  
ALX4  
RRAD  
RXRA  
CACNA1D  
GGCT  
ELOVL6  
STEAP4  
SP6  
WNT5B  
IL18R1  
LITAF  
P2RX5-TAX1BP3  
LINC-ROR  
CDKN1A  
CIB1  
ATG7  
TXNRD2  
PDLIM5  
LARP1BP2  
RNU6-392P

CES1  
ADAM28  
SLC27A4  
NISCH  
FITM2  
COX411  
GNPDA2  
R3HDML  
CYP2C8  
DHCR7  
ARID3A  
EPHX2  
FABP6  
FCGR2B  
KIF6  
GPC5  
P2RX2  
GGA3  
ICOSLG  
ARHGEF12  
LARS2  
NPAS4  
SLC39A1  
SPINK4  
GPS2  
RMC1  
KCNIP1  
HTN1  
IKBKB

ACAT1  
LDHA  
LECT2  
LMX1A  
CIMT  
DNAJB3  
DEFB103A  
MMP7  
MMP12  
MMP13  
MRC1  
MT1X  
MTHFD1  
ACLY  
NF2  
OCA2  
OPRM1  
P2RX1  
P2RY2  
DUOX2  
PAK1  
BFAR  
HDAC7  
GPRC5B  
PEG3  
PFKM  
PIK3C2G  
PLD1  
DUOX1

NANS  
TERF2IP  
TMEM132A  
CEP55  
QRSL1  
RNLS  
SRGN  
PRKAB2  
SLC30A6  
ATF7IP  
CNDP2  
DOK5  
SULF2  
AZGP1  
MEPE  
ABHD6  
ARID1B  
KLHL42  
PREX1  
MAGEE1  
NCOA5  
PTPN9  
PVALB  
FAM3A  
RRAS  
TSPAN31  
MSMO1  
SDC1  
SDC2

XYLT2  
SLAMF1  
SLC16A1  
TF  
SERPING1  
TRH  
UGT2B15  
VIPR1  
VLDLR  
VTN  
SLC30A1  
GHS  
ANKRD55  
ACAD10  
CAMP  
ARID5B  
FCN3  
KLF7  
SOCS2  
TSC22D1  
PER2  
P2RX6  
IL32  
SFXN1  
GFPT2  
CDH2  
AKT3  
OCTN3  
MICC



HMGA1P8  
DIP  
WASHC1  
LINC00994  
GNG12-AS1  
DEFB4B  
BOP  
ALL2  
LY75-CD302  
RPS10-NUDT3  
COMMD3-BMI1  
PLUT  
PREB  
RBM6  
MPHOSPH10  
CDK6  
FLOT1  
OLIG2  
THRIL  
ZMPSTE24  
FSTL3  
LOC102723971  
LOC102723996  
TCIRG1  
WARS2  
DLC1  
ATP8A1  
SPON2  
SPON1

IFI30  
FAM3C  
CDX2  
SALRNA1  
UNC13B  
TEMPS  
PROCR  
AGPAT1  
SPTLC1  
OLFM4  
LRP1-AS  
NPC2  
USP16  
IGF2BP1  
IGF2BP3  
SIRT1-AS  
CTCF  
CD226  
MCS+9.7  
EBP  
CAPN9  
LOC107832851  
SLC17A3  
STARD10  
CGA  
CPLX1  
CGB3  
CEACAM3  
PPP1R13L

CCL27  
CYP46A1  
CEACAM7  
CD300C  
NMU  
FGL2  
EHD1  
CHEK2  
CHM  
CHN2  
BIRC8  
MGAT4A  
CHRNA4  
AD7  
TIRAP  
OSBPL8  
CIDEA  
CKB  
OLIG1  
AP3S1  
CLCN2  
CLCN3  
CLCN5  
GGTA2P  
SPIC  
TPPP2  
TCHHL1  
LYPLAL1  
KLHDC7A

COL2A1  
PIFO  
COL4A2  
COL4A5  
COL8A1  
COL9A1  
COL9A2  
ACVR1C  
COL17A1  
FAM3D  
MAP3K8  
COX5B  
COX7A1  
COX10  
MTPN  
LRGUK  
CPT1B  
GPAT4  
CRABP2  
ADORA3  
ROMO1  
MT1P3  
FGFBP3  
SESN3  
OR2AG1  
CSHL1  
GSC  
BEAN1  
CD300LG

CST2  
PTPRVP  
SLC30A7  
IL23R  
FAM78B  
CLDN19  
CTRL  
CTSH  
CYB5A  
CYP1B1  
CYP2A6  
BRINP1  
DBI  
AKR1C2  
DDX3X  
DQX1  
DEFB4A  
CFD  
AAVS1  
DIAPH2  
SEPTIN1  
DMBT1  
DMP1  
DNNT  
DRD3  
DUSP6  
EBM  
TYMP  
LPAR1

EFNB3  
EGR2  
EGR3  
MLKL  
EIF4A2  
EIF4G1  
ELAVL1  
TET3  
MARK2  
CENPX  
EPHA4  
EPHX1  
ESRRB  
ESRRG  
ETFA  
EVC  
EXT1  
F2RL2  
MED19  
UNC5B  
SKA1  
MARCHF8  
ALDH3B1  
JMJD1C  
SLC39A12  
FCP1  
SLC29A4  
FDXR  
FGF11

FHIT  
COG2  
MLXIP  
SBNO2  
RAB18  
NT5C2  
FAIM2  
KDM1A  
CAND2  
TBC1D9  
SYT11  
SIK2  
ARC  
COBL  
TTC28  
SYNE1  
PSD3  
CRTC1  
DICER1  
NCS1  
ZFPM2  
MLYCD  
TRS-AGA2-3  
SEC14L2  
FAM215A  
ZMYND8  
LY96  
SPESP1  
ALPL

FUT6  
HCG27  
CADM2  
AKNAD1  
SLC41A1  
CASC2  
ANKK1  
GABPB1  
GABRG2  
SLC39A6  
KLK5  
MGAT4C  
GALNT2  
SGMS1  
TENM4  
ATRNL1  
KIFBP  
PITPNC1  
KLHL3  
MYCBP  
GBP2  
HSPB8  
NUPR1  
CNNM1  
GDF1  
PCOLCE2  
TAS2R12P  
RNU12  
GH2



GJA8  
ACAD8  
DKK4  
DISC1  
GLB1  
SERP1  
SIT1  
SESN1  
DHDH  
PDLIM3  
EIF3K  
MCAT  
BIN1  
PCLO  
AMY1A  
AMY1B  
AMY1C  
GOLGB1  
SFN  
GPI  
GPM6A  
GPR1  
AQP11  
H19  
MUC19  
LINC00523  
PGP  
HCCAT5  
CISD3

KCTD1  
GPR21  
MIF-AS1  
TTC28-AS1  
IGHD1-14  
SLC9C1  
CYP4V2  
LY86-AS1  
FFAR3  
ANK2  
GRB2  
SLC27A6  
RGCC  
MCTS1  
KLF15  
MYLIP  
CTNNA3  
GSTA1  
GTF3A  
HOOK2  
GYG1  
RHOD  
SLC39A3  
SLC2A8  
ACAA1  
ERO1A  
TBX21  
SLC40A1  
HSD17B10

HADHA  
HADH  
HAS3  
HBA2  
CFHR2  
HLA-DOA  
HLA-DRA  
HLF  
HMBS  
FOXA3  
HNRNPA1  
HNRNPF  
HOXA5  
HRAS  
BIRC2  
BIRC3  
HTR2B  
HTR4  
ICAM3  
ZFP69  
APOC2  
HSD17B13  
ACTBL2  
APOC4  
LINC01193  
IGFBP4  
IGH  
IK  
FASLG

AQP2  
IL12A  
IL16  
IMPA1  
AQP5  
INSIG1  
KCNB1  
KCNC4  
KCND3  
SLC27A1  
KCNJ10  
KCNK3  
KCNN2  
KCNN3  
KEL  
KIR2DS1  
KIR3DL2  
KPNA1  
KRT7  
CHKB-CPT1B  
RHOA  
KRT19  
KRT31  
LEKR1  
L1CAM  
RND3  
LAMB3  
STMN1  
LIPA

FADS3  
SAMD12  
TOMM5  
LPP  
CYP4F3  
LTF  
LY9  
LY75  
SH2D1A  
TNFSF12-TNFSF13  
MAN1A1  
MAN2A1  
MAX  
ARSL  
MC5R  
ME1  
MEF2C  
MGST3  
KMT2A  
ALDH6A1  
EIF2AK4  
PLIN5  
POTEKP  
PGBP  
MSH2  
MSH5  
MT1B  
MT1F  
MT1G

MT1H  
MT1M  
MT1L  
ATP8  
RNR1  
MTRR  
MYF5  
MYH6  
MYLK  
MYO5A  
ATHS  
NFYA  
NFYB  
NFYC  
NPM1  
NPR1  
NPR2  
NPR3  
NPY2R  
NTRK1  
NUCB1  
NR4A2  
OMG  
G0S2  
SERPINB2  
SLC35B3  
IRAK4  
PCOLCE  
IPO11

IGF2-AS  
DNAJC27  
BPIFA1  
WAC  
CSAD  
HACD3  
LARS1  
SCLY  
PDGFB  
CYRIB  
PDGFRB  
LSR  
ATP5MC1  
PDHB  
PDK2  
WWOX  
PFDN2  
PFKFB2  
PFKFB3  
SERPINE2  
PIK3C2A  
PIK3C3  
PLA2G4A  
SHC3  
PMAIP1  
PML  
ATP7A  
FXYD5  
ATP5PO

PNLIP  
SEPTIN5  
SLC38A2  
NLGN3  
ZFAND6  
EXOSC4  
POU3F1  
UGT1A10  
UGT1A8  
UGT1A7  
UGT1A5  
UGT1A9  
UGT1A4  
UGT1A3  
SLC6A20  
TRPM4  
BNC2  
PPP1R2  
ENOX1  
APPL2  
NAT10  
NEIL3  
LARP6  
LIN7C  
LGR4  
CAMK2N1  
SAGE1  
VPS35  
UGGT2



PRKD1  
DEFB103B  
DMAP1  
NDUFA12  
SLC50A1  
ALG1  
EIF2AK2  
METTL3  
CCL28  
TMPRSS15  
MMP26  
PSG2  
CELF4  
PSMA7  
SMARCAD1  
CA10  
ARNTL2  
PSMB6  
SLC12A9  
HYMAI  
PSMD2  
PSMD3  
CPA6  
SLC39A10  
ATP10A  
PTAFR  
PTGER3  
MRS2  
KIDINS220

XPO5  
PTMA  
USP36  
PTMAP4  
TSHZ3  
CHD8  
USP37  
MIER1  
SPTBN4  
PTPN4  
CCAR2  
PTPN11  
PTPRB  
PTPRS  
CXCL16  
PYGB  
BCAT1  
RAB4A  
RAB5B  
RAB27A  
RAG1  
RANGAP1  
RARB  
REL  
REV3L  
EXOC4  
RNH1  
RORB  
OPN1SW

RPE  
BCS1L  
RPN2  
RPS6KA2  
RPS6KA3  
CLIP1  
RTN1  
S100A4  
SAA1  
SAA2  
SCN8A  
SCO1  
CCL3  
CCL7  
CCL8  
XCL1  
CX3CL1  
SDHA  
SLC17A9  
POTEM  
POU5F1P3  
NSD1  
NFKBIZ  
GMCL1  
GMCL2  
BLVRA  
DCLRE1C  
MT1IP  
CHCHD2P9

POU5F1P4  
BMI1  
FNDC4  
RFX7  
SLC30A5  
SIX3  
SKIL  
ACD  
SLC1A5  
SLC1A7  
FRTS1  
WNK4  
WASH6P  
SLC8A1  
SLCO1A2  
SLPI  
BRD9  
GRAMD2B  
SIGLEC1  
BNIP3  
SOX5  
BPI  
SRI  
SSTR2  
STX5  
SYT4  
TAC3  
TACR3  
TADA2A

TAF1  
TAL1  
TFAP2A  
TIAM1  
TLL1  
ACTG1  
NR2E1  
TOP1  
TOP2A  
TPM1  
HSP90B1  
TRAF3  
ACTG2  
CAPN5  
C5  
TYROBP  
UBE2B  
WARS1  
XDH  
YWHAG  
CA5A  
CACNA1C  
CACNB3  
DUSP26  
VKORC1  
KCTD15  
LY6G6E  
PRRC2A  
IRX3

LAP  
TFEB  
HBFQTL2  
TNFAIP8L2  
NEIL1  
BBS10  
MAFK  
PRR5L  
ADM2  
STN1  
FOSL1  
TSEN2  
COLEC12  
CAMK2A  
MOB2  
NIPA2  
SLC14A2  
TLR10  
ZNF239  
PICALM  
INHBE  
GPR61  
IMMP2L  
HORMAD1  
KAT8  
PPP1R1B  
PHF6  
C7orf50  
ZBED3

DYRK3  
L3MBTL3  
DOC2B  
ZNF469  
GLYR1  
MFSD9  
PTPN5  
IGSF21  
DGKZ  
API5  
SLC22A16  
PIAS1  
CAV2  
RUNX1  
JRK  
HSD17B6  
RUNX3  
VAMP8  
PAGE1  
MBTPS1  
ADAM19  
CBR1  
CBR3  
TNFSF12  
RAB11A  
RIPK2  
DLK1  
GALR2  
BANF1

TMEM11  
EIF2B5  
CCND3  
NOL3  
KALRN  
TAF1C  
EXOC3L2  
CCRL2  
PAPSS2  
USP14  
USP2  
MTMR7  
TRIM47  
HTR3B  
ZBED1  
CD247  
SLC16A7  
CD4  
DSEL  
LARGE1  
GORAB  
ITGB1BP1  
ADGRG1  
PRDM6  
CGB5  
TGFBRAP1  
TMPRSS11D  
PEX16  
CGB8



TJP2  
OPN4  
ITM2B  
AKAP6  
ATG5  
ADAMTS2  
STXBP5L  
CXCL14  
ENTPD3  
GDF3  
KIF20B  
WTAP  
NCOR1  
NCOR2  
CD48  
EIF5B  
AQR  
ECE2  
TOX  
HEPH  
SGSM2  
MAFB  
EXOG  
THRAP3  
KCNE2  
SCO2  
NODAL  
SUFU  
ERGIC1

CDON  
OTX2  
FGF8  
NKX2-5  
SOX3  
VANGL1  
ZIC2  
HESX1  
TRIM8  
DISP1  
FOXH1  
TRIP11  
TGIF1  
ARNT2  
LZTR1  
FUZ  
SLC29A1  
HIF3A  
PRLR  
MFSD2A  
HLA-G  
DALIR  
SLC26A6  
LOC646736  
ADK  
COL6A2  
TBL1X  
GCFC2  
SLC7A1

CLK1  
TRG  
PTBP2  
APMAP  
RAP1A  
SDHC  
IL34  
HPSE2  
PAPPA2  
RPS14  
CDK5R1  
CCNG2  
EBAG9  
PROK1  
IL1F10  
RAMP3  
PRG4  
CALCRL  
MS4A3  
NFE2L3  
SH3PXD2A  
CDK1  
TPH1  
SDS  
ADAMTS5  
CDCA5  
COL14A1  
UPK3B  
HKDC1

ANC  
PAIP1  
CEACAM8  
VIPR2  
INO80B  
LCT  
QPCT  
UTS2B  
C5orf34  
GCHFR  
LHCGR  
PCBP1-AS1  
LUM  
LGALS13  
HOXD13  
GYS2  
GZMM  
CD209  
B3GAT1  
PITX3  
VIT  
PIKFYVE  
ABHD5  
ELF5  
PLAC8  
UBR5  
NR0B1  
POLR2G  
DGCR8

LGALS14  
ASCL1  
MGAT1  
MEST  
FLOT2  
PLXND1  
FGR  
TAS2R9  
FCN2  
BDKRB1  
GPAM  
ACOT1  
S1PR5  
YWHAH  
ACOX1  
CHRM2  
AIFM1  
S1PR4  
NT5E  
NPY1R  
HCN3  
WDR35  
PSMB9  
PPAT  
PHKA1  
ABCB4  
UCHL5  
PDE3A  
PDYN

PFAS  
ATP4B  
ATP5F1A  
OPRK1  
OTC  
PNMT  
PYGM  
CALD1  
CASP6  
SOAT2  
KMT5C  
PRKRA  
UGT2B17  
UCK2  
UMPS  
TOMM70  
SLC28A2  
RGN  
ABCC3  
GMPS  
CCNA2  
CCNB1  
CCNT1  
QDPR  
SCP2  
SSTR3  
SLC28A3  
RAP1B  
RASGRF1

BCKDHA  
BCKDHB  
GRK1  
BDH1  
BDKRB2  
TPI1  
AACS  
SSTR1  
ERCC4  
ABAT  
DRD1  
ACSL3  
FGA  
AOC1  
GCNT1  
GHRHR  
GABBR1  
SCAP  
ACSL6  
GJB6  
TRES2  
ADSS1  
GJD3  
ABCC9  
ATP5PD  
ACMSD  
ADSL  
CYP11B1  
DHODH

KHK  
ARG2  
KCNA5  
KCNA2  
ITGA3  
ITGB1  
ITGB3  
JAK3  
NCF2  
NEFM  
NEFH  
ASS1  
LTBP1  
GUK1  
HDAC1  
GSK3A  
GJB2  
CACNG4  
HMGCL  
HMGCS1  
GNAT3  
HCN1  
HNRNPA2B1  
HPRT1  
SLC51B  
SLC51A  
PRKCSH  
AGGF1  
RDX



RGS2  
WNT3  
TYR  
SMPDL3B  
ETV5  
CYLD  
MFT2  
MSN  
GLOD4  
SLC4A2  
RELB  
SLC4A8  
AMBRA1  
CAPNS1  
MTMR9  
INTS3  
TPM3  
FANCA  
DACH1  
LINC02210-CRHR1  
PTRH1  
SNU13  
PTRH2  
PDK1  
PNPLA8  
NOTCH4  
C1QTNF6  
PRKCQ  
IL19

NDFIP1  
CDR3  
DOCK8  
DDX27  
AICDA  
SLC3A2  
FCGR1B  
JMJD6  
ABL1  
GZMA  
FCGR1A  
SPRY1  
ECI2  
USP18  
CCR7  
LAG3  
IDDM6  
IDDM8  
IFN1@  
SRD5A2  
TERT  
ESR1  
G6PD  
FFAR1  
NR3C2  
MTNR1B  
PTPN1  
SHBG  
VDR

GPBAR1  
HMGCR  
ACHE  
FFAR4  
AR  
IDO1  
CYP19A1  
ACACB  
SREBF2  
PTPN2  
RORC  
CA2  
GC  
MAOA  
NR1H4  
NR1H3  
FGF1  
NPC1L1  
MTNR1A  
ABCB1  
PTPRF  
SLC10A2  
CA1  
SRD5A1  
CD81  
ESR2  
FAAH  
NR1H2  
CYP17A1

GLS  
PTPRC  
SHH  
ENPP2  
SCGB1A1  
TDGF1  
TEP1  
TERF2  
TRIM9  
UGT1A
