# Supplementary material for: Network pharmacology of bioactives from Sorghum bicolor with targets related to diabetes mellitus
Source: PubMed Central journal article supplement (PMC7774932; doi:10.1371/journal.pone.0240873), 2020-12-31
Supplement: pone.0240873.s003.pdf [file pone.0240873.s003.pdf]

**A list of the overlapping 118 genes between SEA and STP**

AKR1B1

CDA

ADK

ADORA3

HSPA5

HSPA8

ADORA1

TOP1

ADORA2A

GAPDH

POLB

ADA

AHCY

TK1

GBA

PDCD4

EHMT1

CA9

CA12

CA14

CA1

POLA1

OGA

PNP

GRK1

CA2

EHMT2

PAM

LPAR6  
CES2  
MPEG1  
DNM1  
FAAH  
PRKCA  
EPHX2  
ENPP2  
ACP1  
CDC25B  
HAO1  
CNR1  
FABP3  
CNR2  
ASAH1  
HSD17B3  
TRPV1  
HMGCR  
S1PR3  
PTPRC  
SLC22A6  
RARB  
PPARG  
TOP2A  
LPAR5  
PPARA  
CDC25A  
CA3  
CA7

OXER1  
PHF8  
GSTK1  
LTB4R  
KDM2A  
PTGER2  
TBXAS1  
TBXA2R  
PTGER4  
PTGIR  
PLA2G4A  
FFAR4  
GABBR1  
PTGER3  
FABP4  
PTGFR  
PPARD  
S1PR1  
KDM5C  
MGLL  
PRKCE  
ALOX5  
FFAR1  
ALOX12  
STS  
CYP17A1  
NPC1L1  
GPBAR1  
SRD5A2

G6PD  
SHBG  
SERPINA6  
CDC45  
VDR  
NR1H3  
NR1H4  
AR  
ESR2  
RORA  
CYP19A1  
SREBF2  
ESR1  
SHH  
RORC  
ABCB1  
NR1H2  
PHLPP1  
AKT1  
CA5B  
CA6  
CA5A  
CA4  
CA13  
MAOB  
NQO1  
PGR  
NFKB1  
CYP1B1

MAOA  
HNF4A  
DRD4
