# Supplementary material for: Network pharmacology of bioactives from Sorghum bicolor with targets related to diabetes mellitus
Source: PubMed Central journal article supplement (PMC7774932; doi:10.1371/journal.pone.0240873), 2020-12-31
Supplement: pone.0240873.s004.pdf [file pone.0240873.s004.pdf]

**A list of 81 genes related to 16 compounds**

AKR1B1

CDA

ADK

ADORA3

HSPA5

ADORA1

TOP1

ADORA2A

GAPDH

ADA

PDCD4

EHMT1

CA1

OGA

GRK1

CA2

EHMT2

PAM

CES2

FAAH

PRKCA

EPHX2

ENPP2

ACP1

CNR1

FABP3

CNR2

HSD17B3

TRPV1  
HMGCR  
PTPRC  
RARB  
PPARG  
TOP2A  
PPARA  
OXER1  
GSTK1  
LTB4R  
TBXA2R  
PLA2G4A  
FFAR4  
GABBR1  
PTGER3  
FABP4  
PPARD  
S1PR1  
MGLL  
PRKCE  
ALOX5  
FFAR1  
ALOX12  
STS  
CYP17A1  
NPC1L1  
GPBAR1  
SRD5A2  
G6PD

SHBG  
VDR  
NR1H3  
NR1H4  
AR  
ESR2  
CYP19A1  
SREBF2  
ESR1  
SHH  
RORC  
ABCB1  
NR1H2  
PHLPP1  
AKT1  
CA6  
CA5A  
CA4  
NQO1  
PGR  
NFKB1  
CYP1B1  
MAOA  
HNF4A
